# Supplementary material
Source: PubMed Central journal article supplement (PMC522037)

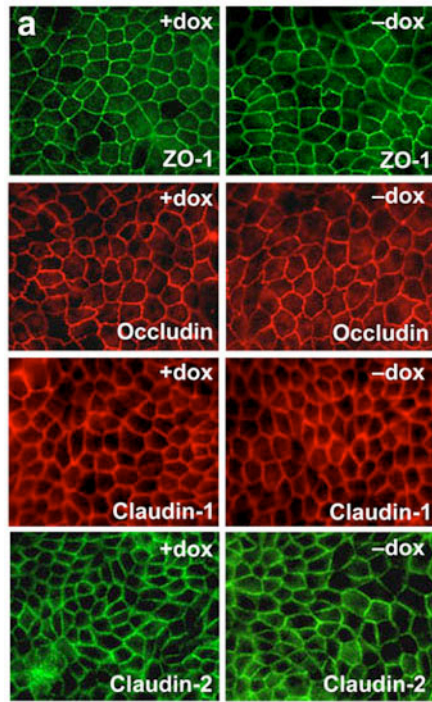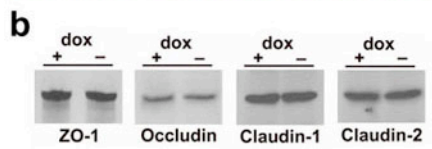

Supplement: pnas_101_41_14877__1.pdf [file pnas_101_41_14877__1.pdf]
